# Supplementary figures and images for: Neuronal guidance molecule netrin-1 attenuates inflammatory cell trafficking during acute experimental colitis
Source: PubMed Central journal article supplement — Gut. 2011 Aug 3;61(5):695–705. doi: 10.1136/gutjnl-2011-300012 (PMC3322588; doi:10.1136/gutjnl-2011-300012), 2011-08-03

# Supplementary Figure 1

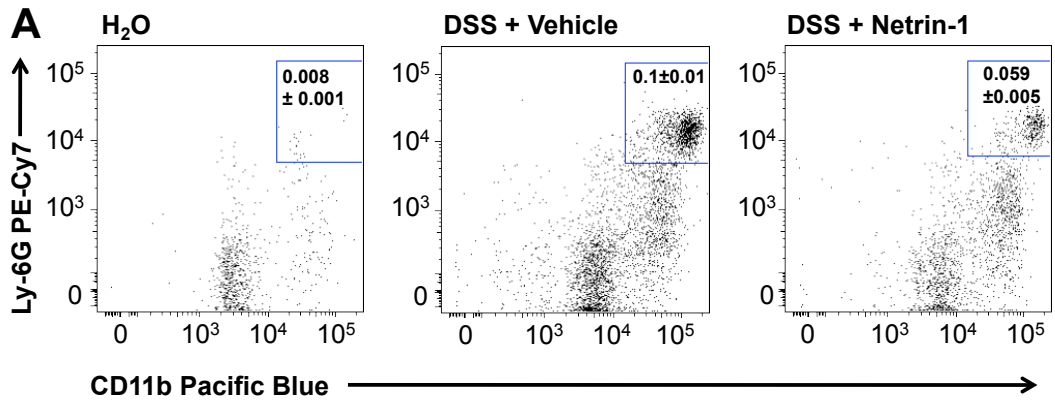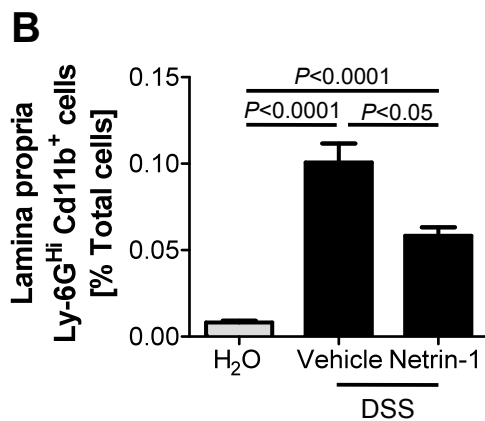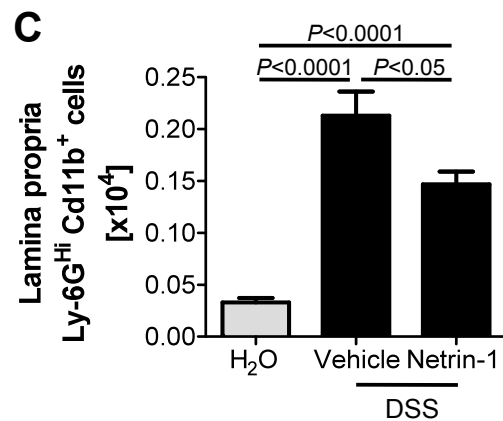

**D** Lamina Propria: Ly6G negative

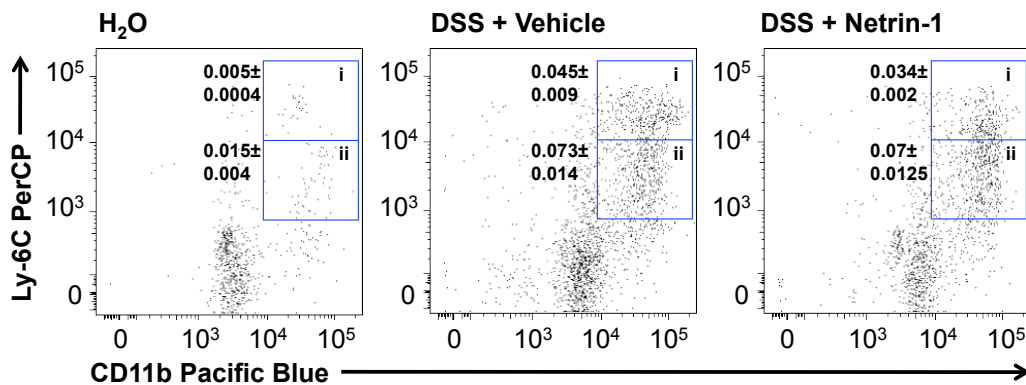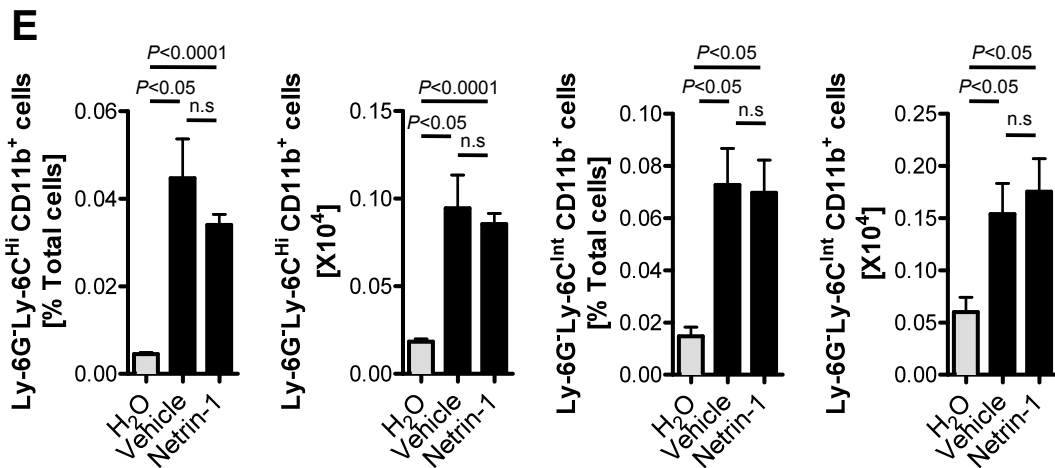

Supplement: gutjnl-2011-300012-s1.pdf [file gutjnl-2011-300012-s1.pdf]
